# Supplementary material
Source: Elsevier journal article supplement (https://www.sciencedirect.com/science/article/pii/S0021755721001340)
Supplement: mmc1 [file S0021755721001340:mmc1.docx]

**JPED-D-2100164 – Supplementary Material**

**Supplementary Material – Flowchart.**

Newborns eligible

n = 775

Not included: (n = 13)

Mothers with psychiatric and/or behavioral disorders: 12

Mother HIV positive:1

n = 762

Follow-up losses (n = 180)

Loss of records and/or data inconsistency: 180

n = 582

Excluded (n = 177)

 Newborns with hospital discharge in the first 7 days: **10**

Newborns evolved to death in the first 7 days: **92**

Newborns that evolved to severe bronchopulmonary dysplasia: 22

Newborns that evolved with severe central nervous system changes: 14

Maternal death: 2

Serious maternal illness/ maternal problems: 34

Newborns without having performed SSC: 3

n = 405
